# Supplementary material for: Triggers of intensive care patients with palliative care needs from nurses’ perspective: a mixed methods study
Source: PubMed Central journal article supplement (PMC11134896; doi:10.1186/s13054-024-04969-1), 2024-05-28
Supplement: 13054_2024_4969_MOESM3_ESM.pdf [file 13054_2024_4969_MOESM3_ESM.pdf]

**Table 2: main and subcategories** (\*Intensive Care Unit)

| main categories                      | subcategories                                                                                                                                                                                                                                                                                                                                                                                                                                     |
|--------------------------------------|---------------------------------------------------------------------------------------------------------------------------------------------------------------------------------------------------------------------------------------------------------------------------------------------------------------------------------------------------------------------------------------------------------------------------------------------------|
| <i>prognosis</i>                     | ethical assessment of the patient situation<br>ethical assessment of the therapy<br>therapeutic limits<br>natural dying<br>overall awareness of the patient's situation<br>decision-making<br>consistency in the carrying out of decisions<br>progression of the disease<br>mechanical ventilation<br>brain injury<br>inauspicious prognosis<br>certain oncological diseases<br>complications<br>need for resuscitation<br>length of stay in ICU* |
| <i>interprofessional cooperation</i> | Involvement of nurses<br>Communication<br>Knowledge about palliative care                                                                                                                                                                                                                                                                                                                                                                         |
| <i>relatives</i>                     | intense burden<br>inclusion in care<br>decision-making<br>Wish for life-sustaining treatment<br>Wish for palliative care                                                                                                                                                                                                                                                                                                                          |
| <i>patients</i>                      | age<br>wish for palliative care<br>symptom burden                                                                                                                                                                                                                                                                                                                                                                                                 |
