# Supplementary material for: Triggers of intensive care patients with palliative care needs from nurses’ perspective: a mixed methods study
Source: PubMed Central journal article supplement (PMC11134896; doi:10.1186/s13054-024-04969-1), 2024-05-28
Supplement: 13054_2024_4969_MOESM5_ESM.pdf [file 13054_2024_4969_MOESM5_ESM.pdf]

### Composition of the focus groups

| focus groups at four university hospitals | total participants (of whom with further training in intensive care) | Departments              |
|-------------------------------------------|----------------------------------------------------------------------|--------------------------|
| 1                                         | 9 (5)                                                                | surgery                  |
| 2                                         | 4 (3)                                                                | neurosurgery and surgery |
| 3                                         | 5 (3)                                                                | internal medicine        |
| 4                                         | 2 (2)                                                                | internal medicine        |
| 5                                         | 3 (2)                                                                | neurosurgery             |
| 6                                         | 5 (2)                                                                | internal medicine        |
